# Supplementary material for: Complement-Mediated Enhancement of SARS-CoV-2 Antibody Neutralisation Potency in Vaccinated Individuals
Source: Research Square preprint supplement (doi:10.21203/rs.3.rs-4693445/v1), 2024-07-19

**Supplementary Table 1:** List of additional authors from the OCTAVE and OCTAVE-DUO TMG consortium.

| <b>OCTAVE &amp; OCTAVE DUO TMG Members</b> |                     |                                               |
|--------------------------------------------|---------------------|-----------------------------------------------|
| <b>Prof</b>                                | Iain McInnes        | Adult Rheumatology/Inflammatory diseases      |
| <b>Prof</b>                                | Stefan Siebert      | Adult Rheumatology/Inflammatory diseases      |
| <b>Prof</b>                                | Pam Kearns          | Adult Cancer (Solid Tumours)                  |
| <b>Prof</b>                                | Dan Rea             | Adult Cancer (Solid Tumours)                  |
| <b>Prof</b>                                | Gordon Cook         | Adult Cancer (Haematology Tumours)            |
| <b>Dr</b>                                  | Michelle Willicombe | Adult Chronic Renal Diseases                  |
| <b>Prof</b>                                | David Thomas        | Adult Chronic Renal Diseases                  |
| <b>Prof</b>                                | Eleanor Barnes      | Adult Chronic Liver Diseases                  |
| <b>Prof</b>                                | Thushan de Silva    | Adult Haematopoietic Stem Cell Transplant     |
| <b>Prof</b>                                | Lucy Wedderburn     | Paediatric Rheumatology/Inflammatory diseases |
| <b>Dr</b>                                  | Rossa Brugha        | Paediatric Solid Organ Transplantation        |
| <b>Dr</b>                                  | Jessica Bate        | Paediatric Cancer                             |
| <b>Prof</b>                                | Carl Goodyear       | Laboratory Lead                               |
| <b>Prof</b>                                | Alex Richter        | Primary Immunodeficiency                      |
| <b>Prof</b>                                | John Snowden        | Adult Stem Cell Transplant                    |
| <b>Prof</b>                                | Jack Satsangi       | CAR-T Cell Therapy                            |
| <b>Prof</b>                                | Sean Hua Lim        | Lymphoid Malignancy                           |
| <b>Miss</b>                                | Amanda Kirkham      | Lead Biostatistician                          |
| <b>Dr</b>                                  | Sarah Bowden        | CRCTU Director of Operations                  |
| <b>Ms</b>                                  | Sophia Magwaro      | Trial Management Team Leader                  |
| <b>Mrs</b>                                 | Ana Hughes          | Senior Trial Coordinator                      |
| <b>Dr</b>                                  | Ann Pope            | Trial Coordinator                             |
| <b>Mrs</b>                                 | Elsbeth Insch       | Patient representative                        |
| <b>Mrs</b>                                 | Vicky Churchill     | Patient representative                        |
| <b>Mrs</b>                                 | Richard Beesley     | Patient representative                        |
| <b>Miss</b>                                | Eilean MacDonald    | Patient representative                        |

**Supplementary Table 2:** MesoScale Discovery (MSD) SARS-CoV-2 antigen information for ACE2 competition assays. Information supplied by MSD as reported in the product documentation “V-PLEX COVID-19 ACE2 Neutralization Assays insert”.

| Spot | SARS-CoV-2 Antigen                                                                     | Lineage | Amino Acid Modifications                                                                                                                                                                                                                           |
|------|----------------------------------------------------------------------------------------|---------|----------------------------------------------------------------------------------------------------------------------------------------------------------------------------------------------------------------------------------------------------|
| 1    | Spike (Wuhan)                                                                          | Wuhan   | Not Applicable                                                                                                                                                                                                                                     |
| 2    | Spike (BA.2.12.1)                                                                      | Omicron | T19I, (L24-A27)toS, G142D, V213G, G339D, S371F, S373P, S375F, T376A, D405N, R408S, K417N, N440K, L452Q, S477N, T478K, E484A, Q493R, Q498R, N501Y, Y505H, D614G, H655Y, N679K, P681H, S704LN764K, D796Y, Q954H, N969K                               |
| 3    | Nucleocapsid                                                                           | Wuhan   | Not Applicable                                                                                                                                                                                                                                     |
| 4    | Spike (BA.2.75)                                                                        | Omicron | T19I, L24-A27>S, G142D, K147E, W152R, F157L, I210V, V213G, G257S, G339H, S371F, S373P, S375F, T376A, D405N, R408S, K417N, N440K, G446S, N460K, S477N, T478K, E484A, Q498R, N501Y, Y505H, D614G, H655Y, N679K, P681H, N764K, D796Y, Q954H, N969K    |
| 5    | Spike (BA.2; BA.2.1; BA.2.2; BA.2.3; BA.2.5; BA.2.6; BA.2.7; BA.2.8; BA.2.10; BA.2.12) | Omicron | T19I, (L24-A27)toS, G142D, V213G, G339D, S371F, S373P, S375F, T376A, D405N, R408S, K417N, N440K, S477N, T478K, E484A, Q493R, Q498R, N501Y, Y505H, D614G, H655Y, N679K, P681H, N764K, D796Y, Q954H, N969K                                           |
| 6    | Spike (B.1.1.529; BA.1; BA.1.15)                                                       | Omicron | A67V, ΔH69-V70, T95I, G142D, Δ143-145, Δ211/L212I, ins214EPE, G339D, S371L, S373P, S375F, K417N, N440K, G446S, S477N, T478K, E484A, Q493R, G496S, Q498R, N501Y, Y505H, T547K, D614G, H655Y, N679K, P681H, N764K, D796Y, N856K, Q954H, N969K, L981F |
| 7    | Spike (B.1.617.2; AY.4)                                                                | Delta   | <b>(Alt Seq 2):</b> T19R, T95I, G142D, Δ156/157, R158G, L452R, T478K, D614G, P681R, D950N                                                                                                                                                          |
| 8    | Spike (B.1.1.7)                                                                        | Alpha   | ΔH69-V70, ΔY144, N501Y, A570D, D614G, P681H, T716I, S982A, D1118H                                                                                                                                                                                  |
| 9    | Spike (B.1.351)                                                                        | Beta    | L18F, D80A, D215G, Δ242-244, R246I, K417N, E484K, N501Y, D614G, A701V                                                                                                                                                                              |
| 10   | Spike (BA.5)                                                                           | Omicron | T19I, (L24-A27)toS, del69/70, G142D, V213G, G339D, S371F, S373P, S375F, T376A, D405N, R408S, K417N, N440K, L452R, S477N, T478K, E484A, F486V, Q498R, N501Y, Y505H, D614G, H655Y, N679K, P681H, N764K, D796Y, Q954H, N969K                          |

Note: Alternative S-GENE mutations for Spike of B.1.617.2 is listed as "Alt Seq 2."

**Supplementary Figure 1:** Comparison of raw foci numbers as a measure of SARS-CoV-2 infection for microneutralisation assay controls in the absence of OPTIC immune sera. The addition of pooled human plasma (PHP) or heat-inactivated (HI)-FCS did not significantly reduce the level of infection in absence of immune sera. In some conditions, the level of infection was significantly higher than the conditions supplemented with media-only. Each spot indicates a single replicate from a total of 8 replicates per plate, with all plates tested. Significance with  $P < 0.05$  was determined by Kruskal-Wallis test with Dunn's multiple comparisons test in GraphPad Prism (version 10).

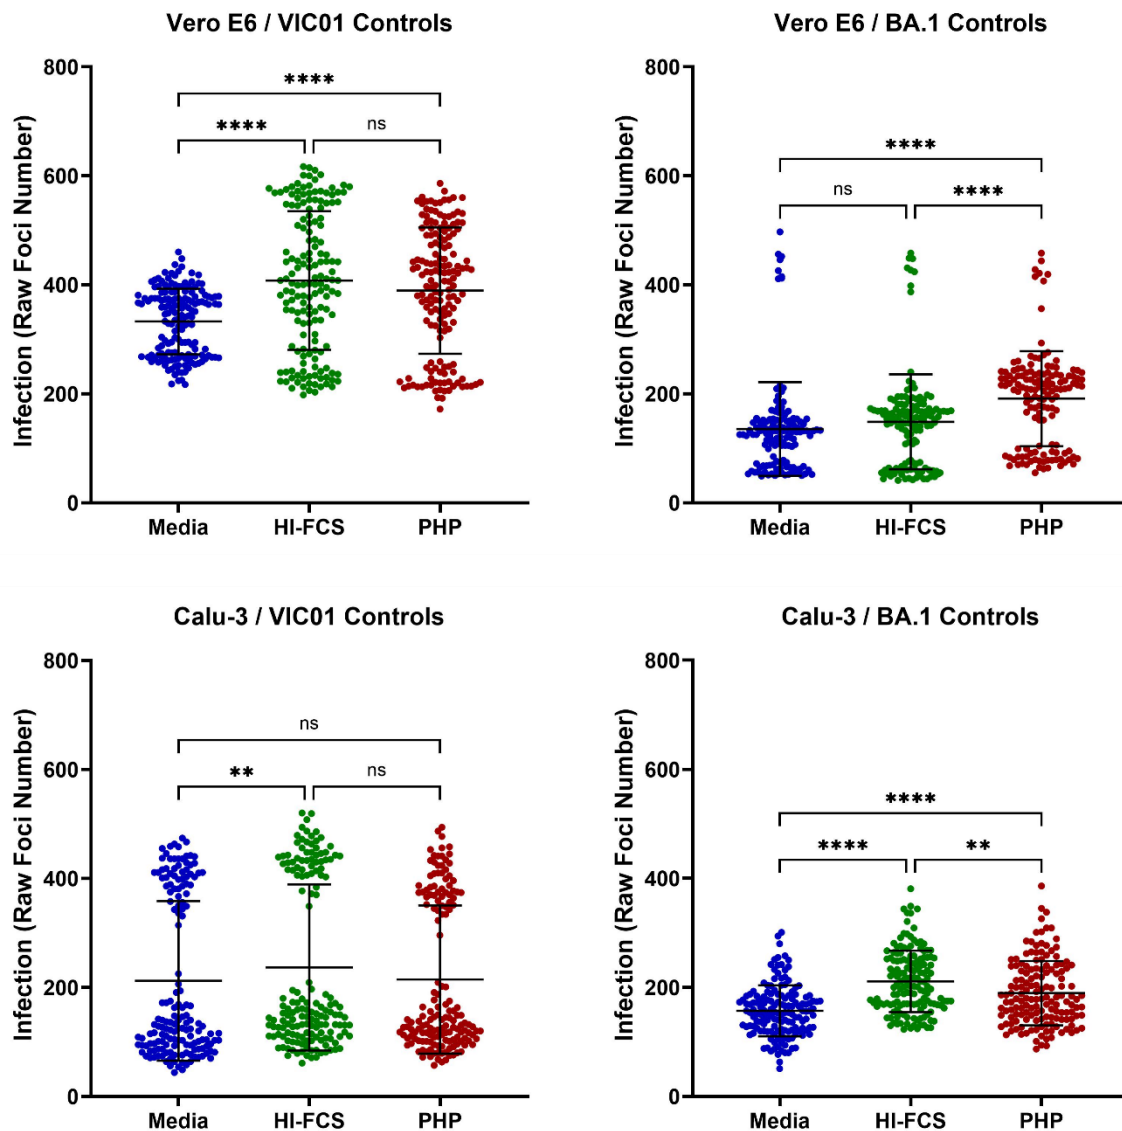

**Supplementary Figure 2: (A)** Cytotoxicity test using Calu-3 cells with media only, 20% pooled human plasma (PHP), 20% C3/C5 depleted plasma, or 1.8% DMSO as a positive control. Tearing from manual pipetting was evident in some conditions and cytotoxicity was evident only in the 1.8% DMSO condition. **(B)** Cytotoxicity test using Vero E6 cells with media only, 20% PHP, or 3% DMSO as a positive control. Conditions replicated the microneutralisation assay procedure and cells were stained with 0.2% crystal violet in 20% ethanol. Cytotoxicity was only evident in the 3% DMSO condition.

**(A)**

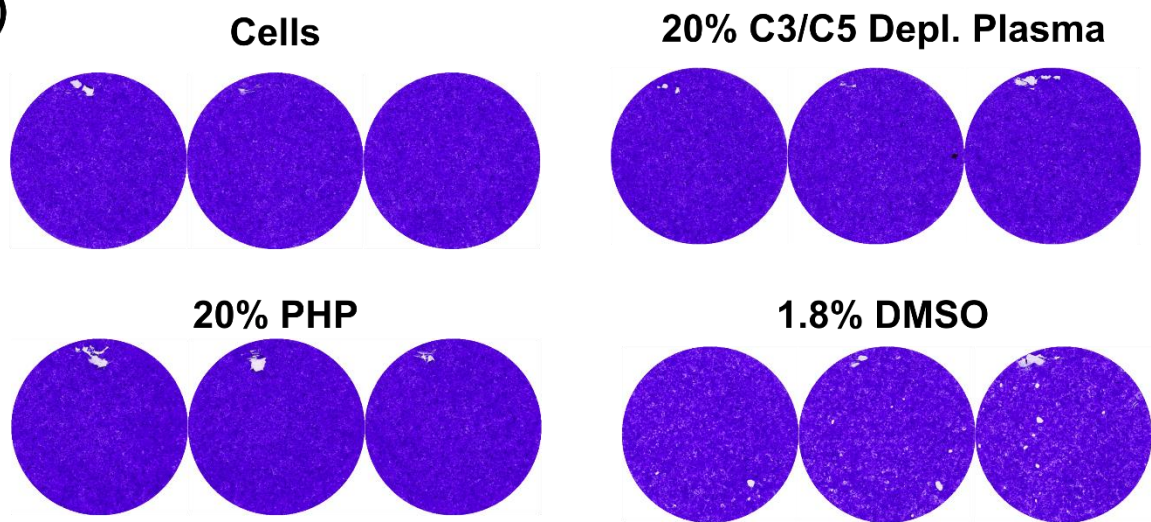

**(B)**

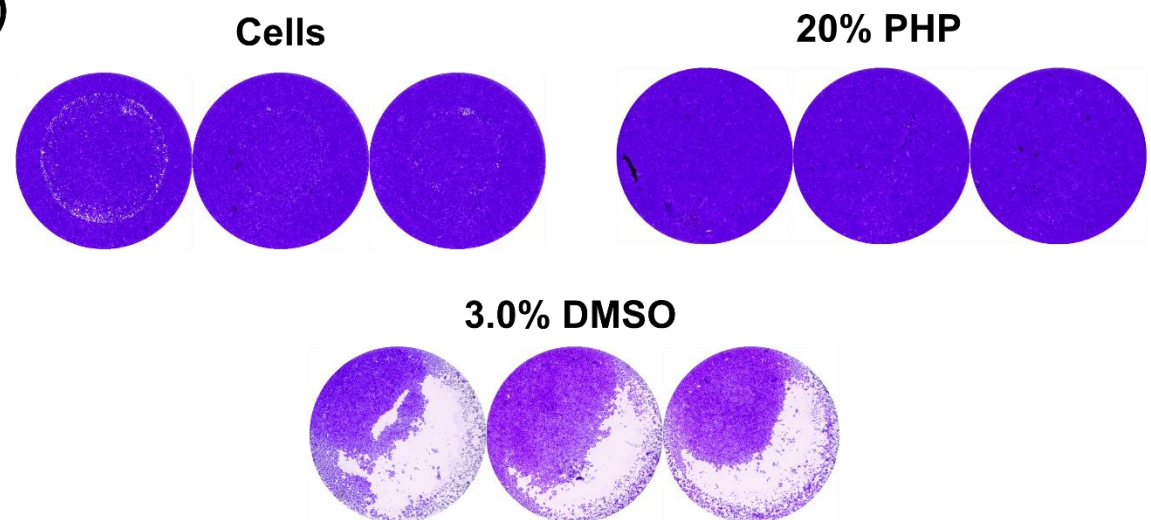



**Supplementary Figure 4:** Correlations with IgM and IgG binding to Coronavirus spike proteins determined via MesoScale Discovery (MSD) against SARS-CoV-2 (VIC01 strain) neutralisation titres for the OCTAVE (n = 21) and OPTIC (n = 10) cohorts. Corrected for multiple comparisons using Benjamini-Hochberg test (false discovery rate < 0.05) in GraphPad Prism (version 10). \* P < 0.05, \*\* P < 0.01, \*\*\* P < 0.001, \*\*\*\* P < 0.0001.

(A) OCTAVE Cohort IgM (log2 Normalised) Pearson Correlation Matrix

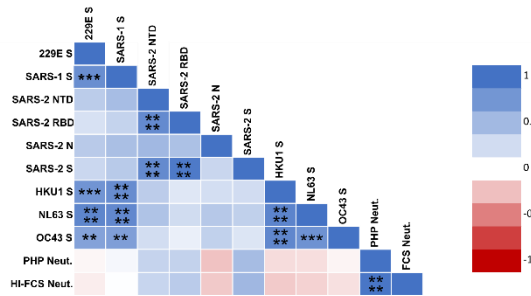

(B) OCTAVE Cohort IgG (log2 Normalised) Pearson Correlation Matrix

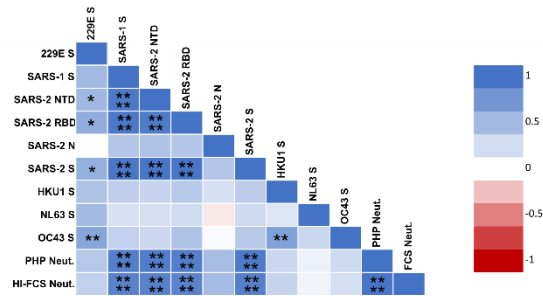

(C) OPTIC Cohort IgG (log2 Normalised) Pearson Correlation Matrix - Calu-3 / VIC01

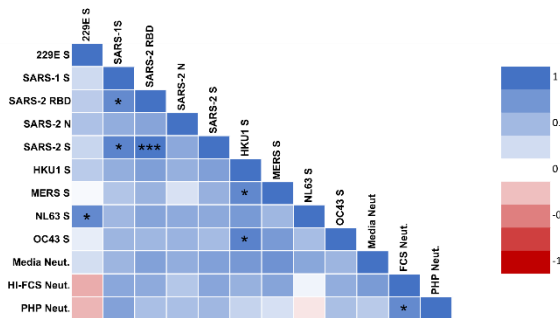

(D) OPTIC Cohort IgG (log2 Normalised) Pearson Correlation Matrix - Vero E6 / VIC01

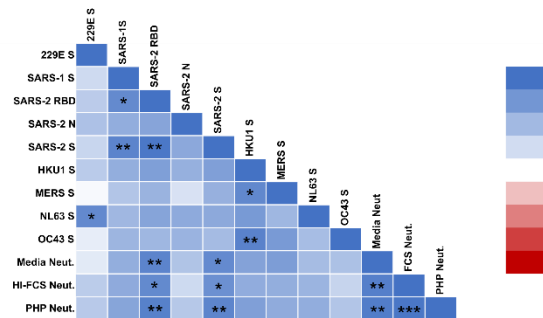

(E) OPTIC Cohort IgG (log2 Normalised) Pearson Correlation Matrix - Vero E6 / BA.1

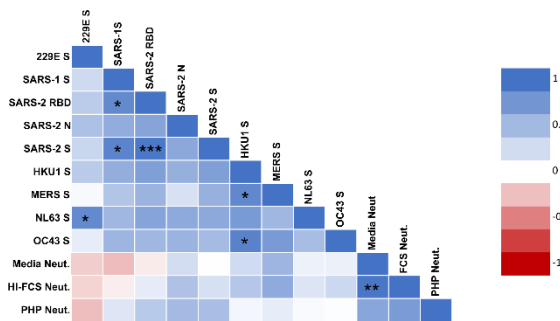

(F) OPTIC Cohort IgG (log2 Normalised) Pearson Correlation Matrix - Calu-3 / BA.1

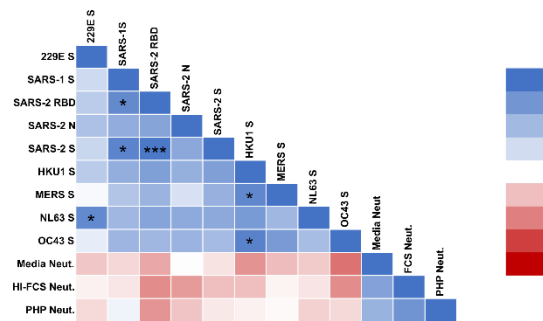

**Supplementary Figure 5:** Comparison of wild-type SARS-CoV-2 spike IgG titres between the OPTIC (n = 10) and OCTAVE (n = 21) cohorts as determined via MesoScale Discovery (MSD). Each spot represents the mean value of each sample tested in duplicate. Error bars show the mean and standard error. Significance was determined via an unpaired t test with Welch's correction. \*\*\*\* P <0.0001.

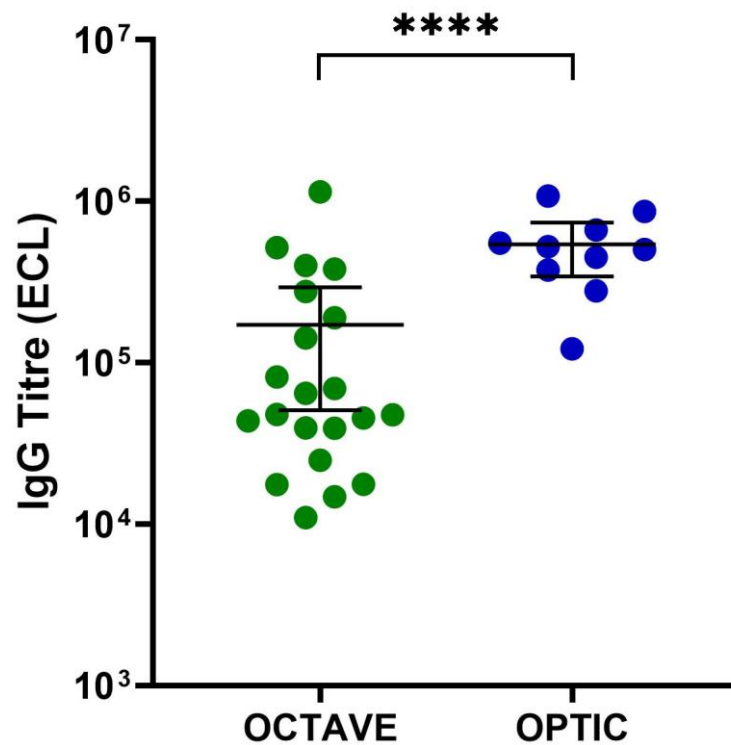

Supplement: Supplementary file 1 [file 63e55e0cff35acd2f42b2c7c.pdf]
