# Supplementary material for: Complement-Mediated Enhancement of SARS-CoV-2 Antibody Neutralisation Potency in Vaccinated Individuals
Source: Research Square preprint supplement (doi:10.21203/rs.3.rs-4693445/v1), 2024-07-19
Supplement: Supplementary file 1 [file 79898323cbc42d1c0afa426e.xlsx]

## Sheet: Sheet1
Sample	Condition		OPTIC Serum Sample Dilutions
		Cell Type/Virus Strain:	Vero E6 / VIC01	Vero E6 / BA.1	Calu-3 / VIC01	Calu-3 / BA .1
1	Media	NT50:	1:1529	1:200	1:1187	1:66
		[95% CI]	[1208 to 1948]	[143 to 283]	[875 to 1630]	[39 to 151]
	HI-FCS	NT50:	1:1290	1:180	1:1281	1:93
		[95% CI]	[1066 to 1567]	[139 to 236]	[916 to 1800]	[61 to 142]
	PHP	NT50:	1:2435	1:365	1:10934	1:688
		[95% CI]	[2270 to 2612]	[303 to 441]	[8639 to 13907]	[1200 to 2367]
	Analysis	Log2 Fold Enhancement (PHP Vs Media)	0.669027	0.871844	3.2032	3.38128
		Log2 Fold Enhancement (PHP Vs HI-FCS)	0.918386	1.02148	3.09424	2.88557
		Significant Change in NT50?	Yes	Yes	Yes	Yes
2	Media	NT50	1:2068	1:83	1:701	<1:10
		[95% CI]	[1714 to 2502]	[64 to 107]	[507 to 979]	[NA]
	HI-FCS	NT50	1:1771	1:97	1:1576	<1:10
		[95% CI]	[1517 to 2073]	[75 to 125]	[1205 to 2067]	[NA]
	PHP	NT50	1:4153	1:198	1:13211	1:325
		[95% CI]	[3806 to 4533]	[157 to 249]	[10791 to 16230]	[181 to 571]
	Analysis	Log2 Fold Enhancement (PHP Vs Media)	1	1.25701	4.23649	>5.02
		Log2 Fold Enhancement (PHP Vs HI-FCS)	1.23266	1.02857	3.06695	>5.02
		Significant Change in NT50?	Yes	Yes	Yes	Yes
3	Media	NT50	1:2825	1:136	1:1807	<1:10
		[95% CI]	[2293 to 3500]	[94 to 200]	[1171 to 2835]	[NA]
	HI-FCS	NT50	1:2687	1:130	1:2169	1:22
		[95% CI]	[2276 to 3183]	[92 to 185]	[1568 to 3036]	[7 to 46]
	PHP	NT50	1:4356	1:165	1:14885	1:230
		[95% CI]	[3984 to 4767]	[128 to 213]	[12163 to 18258]	[137 to 377]
	Analysis	Log2 Fold Enhancement (PHP Vs Media)	0.62293	0.275007	3.04264	>4.52
		Log2 Fold Enhancement (PHP Vs HI-FCS)	0.695994	0.344828	2.77821	3.38543
		Significant Change in NT50?	Yes	No	Yes	Yes
4	Media	NT50	1:489	<1:10	1:311	<1:10
		[95% CI]	[445 to 536]	[NA]	[119 to 631]	[NA]
	HI-FCS	NT50	1:524	<1:10	1:471	<1:10
		[95% CI]	[443 to 622]	[NA]	[241 to 886]	[NA]
	PHP	NT50	1:877	<1:10	1:5707	<1:10
		[95% CI]	[820 to 937]	[NA]	[3851 to 8497]	[NA]
	Analysis	Log2 Fold Enhancement (PHP Vs Media)	0.83996	NA	4.19771	NA
		Log2 Fold Enhancement (PHP Vs HI-FCS)	0.739848	NA	3.59932	NA
		Significant Change in NT50?	Yes	No	Yes	No
5	Media	NT50	1:2705	1:94	1:1468	<1:10
		[95% CI]	[2278 to 3223]	[72 to 122]	[932 to 2320]	[NA]
	HI-FCS	NT50	1:1937	1:118	1:1834	<1:10
		[95% CI]	[1655 to 2271]	[84 to 166]	[1186 to 2821]	[NA]
	PHP	NT50	1:4745	1:245	1:24006	1:63
		[95% CI]	[4471 to 5038]	[191 to 314]	[20070 to 28933]	[41 to 93]
	Analysis	Log2 Fold Enhancement (PHP Vs Media)	0.807355	1.38405	4.03122	>2.66
		Log2 Fold Enhancement (PHP Vs HI-FCS)	1.29278	1.05658	3.71039	>2.66
		Significant Change in NT50?	Yes	Yes	Yes	Yes
6	Media	NT50	1:1215	<1:10	1:727	<1:10
		[95% CI]	[989 to 1501]	[NA]	[402 to 1290]	[NA]
	HI-FCS	NT50	1:1040	<1:10	1:758	<1:10
		[95% CI]	[856 1268]	[NA]	[468 to 1229]	[NA]
	PHP	NT50	1:1946	<1:10	1:3637	1:126
		[95% CI]	[1797 to 2109]	[NA]	[2655 to 5003]	[69 to 371]
	Analysis	Log2 Fold Enhancement (PHP Vs Media)	0.678072	NA	2.32193	>3.66
		Log2 Fold Enhancement (PHP Vs HI-FCS)	0.903038	NA	2.26003	>3.66
		Significant Change in NT50?	Yes	No	Yes	Yes
7	Media	NT50	1:2261	1:67	1:604	<1:10
		[95% CI]	[1927 to 2661]	[51 to 87]	[398 to 917]	[NA]
	HI-FCS	NT50	1:2297	1:71	1:850	<1:10
		[95% CI]	[2062 to 2559]	[48 to 106]	[611 to 1186]	[NA]
	PHP	NT50	1:4029	1:275	1:6033	1:43
		[95% CI]	[3608 to 4507]	[216 to 349]	[4259 to 8644]	[29 to 63]
	Analysis	Log2 Fold Enhancement (PHP Vs Media)	0.831877	2.03562	3.31904	>2.1
		Log2 Fold Enhancement (PHP Vs HI-FCS)	0.807355	2.03562	2.82579	>2.1
		Significant Change in NT50?	Yes	Yes	Yes	Yes
8	Media	NT50	1:2296	1:161	1:1509	<1:10
		[95% CI]	[1896 to 2791]	[112 to 233]	[1032 to 2209]	[NA]
	HI-FCS	NT50	1:2190	1:150	1:596	<1:10
		[95% CI]	[1947 to 2465]	[95 to 236]	[476 to 750]	[NA]
	PHP	NT50	1:4674	1:205	1:2541	1:97
		[95% CI]	[4005 to 5467]	[165 to 257]	[2138 to 3018]	[46 to 187]
	Analysis	Log2 Fold Enhancement (PHP Vs Media)	1.02857	0.344828	0.748461	>3.28
		Log2 Fold Enhancement (PHP Vs HI-FCS)	1.09085	0.454176	2.09085	>3.28
		Significant Change in NT50?	Yes	No	Yes	Yes
9	Media	NT50	1:1007	1:49	1:246	<1:10
		[95% CI]	[864 to 1174]	[26 to 81]	[149 to 377]	[NA]
	HI-FCS	NT50	1:1343	1:47	1:451	<1:10
		[95% CI]	[1125 to 1605]	[25 to 76]	[284 to 692]	[NA]
	PHP	NT50	1:2664	1:85	1:4931	1:375
		[95% CI]	[2354 to 3017]	[66 to 109]	[3503 to 7016]	[182 to 839]
	Analysis	Log2 Fold Enhancement (PHP Vs Media)	1.40599	0.790772	4.32481	>5.23
		Log2 Fold Enhancement (PHP Vs HI-FCS)	0.9855	0.847997	3.45022	>5.23
		Significant Change in NT50?	Yes	No	Yes	Yes
10	Media	NT50	1:1555	1:53	1:950	1:10
		[95% CI]	[1347 to 1797]	[45 to 63]	[672 to 1361]	[5 to 13]
	HI-FCS	NT50	1:2311	1:62	1:825	1:42
		[95% CI]	[2066 to 2586]	[44 to 88]	[662 to 1039]	[26 to 66]
	PHP	NT50	1:4394	1:148	1:9309	1:834
		[95% CI]	[3340 to 5658]	[112 to 197]	[7606 to 11416]	[485 to 1344]
	Analysis	Log2 Fold Enhancement (PHP Vs Media)	1.5008	1.48027	3.29131	6.38198
		Log2 Fold Enhancement (PHP Vs HI-FCS)	0.925999	1.25701	3.4957	4.31179
		Significant Change in NT50?	Yes	Yes	Yes	Yes
	Supplementary Table 3: Summary of NT50 values for the OPTIC cohort, showing an average of the NT50 values from two independent experiments conducted in duplicate. A significant change in NT50 was determined by the sum-of-squares F test with non-overlapping 95% confidence intervals. CI = confidence intervals (lower-limit to upper-limit). NA = not applicable, an NT50 value could not be determined.
