# Supplementary material for: Complement-Mediated Enhancement of SARS-CoV-2 Antibody Neutralisation Potency in Vaccinated Individuals
Source: Research Square preprint supplement (doi:10.21203/rs.3.rs-4693445/v1), 2024-07-19
Supplement: Supplementary file 2 [file d8d6bf0fcfc9fe1e081d18a7.xlsx]

## Sheet: Sheet1
Sample	Condition		OCTAVE Serum Sample Dilutions
			Vero E6 / VIC01
		Experimental Replicate:	1	2	3
1	HI-FCS	NT50:	1:328	NA	NA
		[95% CI]	[274 to 397]	NA	NA
	PHP	NT50:	1:312	NA	NA
		[95% CI]	[275 to 353]	NA	NA
	Analysis	Log2 Fold Enhancement (PHP Vs HI-FCS)	-0.0740006	NA	NA
		Significant Change in NT50?	No	NA	NA
2	HI-FCS	NT50:	1:6251	NA	NA
		[95% CI]	[5003 to 8088]	NA	NA
	PHP	NT50:	1:5231	NA	NA
		[95% CI]	[4821 to 5680]	NA	NA
	Analysis	Log2 Fold Enhancement (PHP Vs HI-FCS)	-0.268817	NA	NA
		Significant Change in NT50?	No	NA	NA
3	HI-FCS	NT50:	1:927	1:817	1:925
		[95% CI]	[707 to 1220]	[673 to 993]	[699 to 1229]
	PHP	NT50:	1:1754	1:1406	1:1362
		[95% CI]	[1555 to 1979]	[1244 to 1591]	[1286 to 1445]
	Analysis	Log2 Fold Enhancement (PHP Vs HI-FCS)	0.918386	0.918386	0.555816
		Significant Change in NT50?	Yes	Yes	Yes
4	HI-FCS	NT50:	1:178	1:279	NA
		[95% CI]	[145 to 219]	[208 to 377]	NA
	PHP	NT50:	1:278	1:407	NA
		[95% CI]	[257 to 301]	[315 to 533]	NA
	Analysis	Log2 Fold Enhancement (PHP Vs HI-FCS)	0.641546	0.545968	NA
		Significant Change in NT50?	Yes	No	NA
5	HI-FCS	NT50:	1:2400	NA	NA
		[95% CI]	[1888 to 3063]	NA	NA
	PHP	NT50:	1:2620	NA	NA
		[95% CI]	[2070 to 3364]	NA	NA
	Analysis	Log2 Fold Enhancement (PHP Vs HI-FCS)	0.124328	NA	NA
		Significant Change in NT50?	No	NA	NA
6	HI-FCS	NT50:	1:206	1:100	1:120
		[95% CI]	[178 to 240]	[84 to 118]	[104 to 142]
	PHP	NT50:	1:268	1:191	1:358
		[95% CI]	[248 to 290]	[177 to 207]	[313 to 413]
	Analysis	Log2 Fold Enhancement (PHP Vs HI-FCS)	0.378512	0.925999	1.57531
		Significant Change in NT50?	Yes	Yes	Yes
7	HI-FCS	NT50:	1:156	NA	NA
		[95% CI]	[125 to 197]	NA	NA
	PHP	NT50:	1:210	NA	NA
		[95% CI]	[189 to 234]	NA	NA
	Analysis	Log2 Fold Enhancement (PHP Vs HI-FCS)	0.422233	NA	NA
		Significant Change in NT50?	Yes	NA	NA
8	HI-FCS	NT50:	1:3555	NA	NA
		[95% CI]	[3097 to 4080]	NA	NA
	PHP	NT50:	1:3586	NA	NA
		[95% CI]	[3212 to 4007]	NA	NA
	Analysis	Log2 Fold Enhancement (PHP Vs HI-FCS)	0	NA	NA
		Significant Change in NT50?	No	NA	NA
9	HI-FCS	NT50:	1:270	NA	NA
		[95% CI]	[233 to 317]	NA	NA
	PHP	NT50:	1:279	NA	NA
		[95% CI]	[249 to 315]	NA	NA
	Analysis	Log2 Fold Enhancement (PHP Vs HI-FCS)	0.0426443	NA	NA
		Significant Change in NT50?	No	NA	NA
10	HI-FCS	NT50:	1:57	NA	NA
		[95% CI]	[42 to 79]	NA	NA
	PHP	NT50:	1:86	NA	NA
		[95% CI]	[71 to 103]	NA	NA
	Analysis	Log2 Fold Enhancement (PHP Vs HI-FCS)	0.594549	NA	NA
		Significant Change in NT50?	Yes	NA	NA
11	HI-FCS	NT50:	1:7625	NA	NA
		[95% CI]	[6437 to 9249]	NA	NA
	PHP	NT50:	1:8028	NA	NA
		[95% CI]	[6967 to 9336]	NA	NA
	Analysis	Log2 Fold Enhancement (PHP Vs HI-FCS)	0.0703893	NA	NA
		Significant Change in NT50?	No	NA	NA
12	HI-FCS	NT50:	1:674	NA	NA
		[95% CI]	[514 to 930]	NA	NA
	PHP	NT50:	1:594	NA	NA
		[95% CI]	[534 to 664]	NA	NA
	Analysis	Log2 Fold Enhancement (PHP Vs HI-FCS)	-0.713119	NA	NA
		Significant Change in NT50?	No	NA	NA
13	HI-FCS	NT50:	1:2860	NA	NA
		[95% CI]	[2184 to 3812]	NA	NA
	PHP	NT50:	1:3050	NA	NA
		[95% CI]	[2526 to 3700]	NA	NA
	Analysis	Log2 Fold Enhancement (PHP Vs HI-FCS)	0.0976108	NA	NA
		Significant Change in NT50?	No	NA	NA
14	HI-FCS	NT50:	1:162	NA	NA
		[95% CI]	[124 to 215]	NA	NA
	PHP	NT50:	1:235	NA	NA
		[95% CI]	[208 to 267]	NA	NA
	Analysis	Log2 Fold Enhancement (PHP Vs HI-FCS)	0.536053	NA	NA
		Significant Change in NT50?	Yes	NA	NA
15	HI-FCS	NT50:	1:130	NA	NA
		[95% CI]	[91 to 196]	NA	NA
	PHP	NT50:	1:119	NA	NA
		[95% CI]	[106 to 134]	NA	NA
	Analysis	Log2 Fold Enhancement (PHP Vs HI-FCS)	-0.120294	NA	NA
		Significant Change in NT50?	No	NA	NA
16	HI-FCS	NT50:	1:138	NA	NA
		[95% CI]	[123 to 156]	NA	NA
	PHP	NT50:	1:151	NA	NA
		[95% CI]	[133 to 174]	NA	NA
	Analysis	Log2 Fold Enhancement (PHP Vs HI-FCS)	0.124328	NA	NA
		Significant Change in NT50?	No	NA	NA
17	HI-FCS	NT50:	1:140	NA	NA
		[95% CI]	[108 to 181]	NA	NA
	PHP	NT50:	1:207	NA	NA
		[95% CI]	[178 to 242]	NA	NA
	Analysis	Log2 Fold Enhancement (PHP Vs HI-FCS)	0.565597	NA	NA
		Significant Change in NT50?	Yes	NA	NA
18	HI-FCS	NT50:	1:76	1:100	NA
		[95% CI]	[56 to 104]	[63 to 162]	NA
	PHP	NT50:	1:182	1:125	NA
		[95% CI]	[153 to 217]	[92 to 175]	NA
	Analysis	Log2 Fold Enhancement (PHP Vs HI-FCS)	1.25701	0.321928	NA
		Significant Change in NT50?	Yes	No	NA
19	HI-FCS	NT50:	1:102	NA	NA
		[95% CI]	[81 to 129]	NA	NA
	PHP	NT50:	1:129	NA	NA
		[95% CI]	[104 to 161]	NA	NA
	Analysis	Log2 Fold Enhancement (PHP Vs HI-FCS)	0.333424	NA	NA
		Significant Change in NT50?	No	NA	NA
20	HI-FCS	NT50:	1:200	1:239	1:255
		[95% CI]	[174 to 230]	[218 to 263]	[230 to 283]
	PHP	NT50:	1:330	1:357	1:553
		[95% CI]	[308 to 354]	[305 to 421]	[440 to 783]
	Analysis	Log2 Fold Enhancement (PHP Vs HI-FCS)	0.722466	0.575312	1.08406
		Significant Change in NT50?	Yes	Yes	Yes
21	HI-FCS	NT50:	1:193	1:257	1:320
		[95% CI]	[177 to 212]	[238 to 278]	[277 to 389]
	PHP	NT50:	1:282	1:395	1:664
		[95% CI]	[277 to 288]	[350 to 449]	[619 to 728]
	Analysis	Log2 Fold Enhancement (PHP Vs HI-FCS)	0.545968	0.62293	1.05658
		Significant Change in NT50?	Yes	Yes	Yes
	Supplementary Table 4: Summary of NT50 values for the OCTAVE cohort, showing each individual experiment. A significant change in NT50 was determined by the sum-of-squares F test with non-overlapping 95% confidence intervals. CI = confidence intervals (lower-limit to upper-limit). NA = not applicable.
